# Supplementary material for: Serum Iodine as a Potential Individual Iodine Status Biomarker: A Cohort Study of Mild Iodine Deficient Pregnant Women in China
Source: MDPI journal article supplement (doi:10.3390/nu15163555), 2023-08-11
Supplement: s1 [file s1]

## Supplementary Information

# Serum Iodine as a Potential Individual Iodine Status Biomarker: A Cohort Study of Mild Iodine Deficient Pregnant Women in China

Xueqing Li, Pengcheng Tu, Simeng Gu, Zhe Mo, Lizhi Wu, Mingluan Xing, Zhijian Chen and Xiaofeng Wang \*

Department of Environmental Health, Zhejiang Provincial Center for Disease Control and Prevention, 3399 Binsheng Road, Hangzhou 310051, China; xqli@cdc.zj.cn (X.L.); pchtu@cdc.zj.cn (P.T.); smgu@cdc.zj.cn (S.G.); zhmo@cdc.zj.cn (Z.M.); lzhwu@cdc.zj.cn (L.W.); mlxing@cdc.zj.cn (M.X.); zhjchen@cdc.zj.cn (Z.C.)

\* Correspondence: xfwang@cdc.zj.cn; Tel.: +86-0571-87115225

Table S1. Poisson regression exploring the effect of serum iodine level and urinary iodine level on thyroid diseases.

|                                     | Hypothyroxinemia               |       |                                |       | Thyrotoxicosis                  |       |                                 |       |
|-------------------------------------|--------------------------------|-------|--------------------------------|-------|---------------------------------|-------|---------------------------------|-------|
|                                     | Unadjusted                     |       | Adjusted <sup>1</sup>          |       | Unadjusted                      |       | Adjusted <sup>1</sup>           |       |
|                                     | OR (95% CI)                    | P     | OR (95% CI)                    | P     | OR (95% CI)                     | P     | OR (95% CI)                     | P     |
| SIC (µg/L)                          |                                |       |                                |       |                                 |       |                                 |       |
| <72.4 (Quartile 1)                  | <b>9.046</b><br>(5.288-15.473) | 0.000 | <b>8.165</b><br>(4.787-13.927) | 0.000 | 0.403<br>(0.117-1.390)          | 0.150 | 0.412<br>(0.119-1.423)          | 0.161 |
| 72.4-93.9 (Quartile 2 +Quartile 3 ) | 1(referent)                    |       | 1(referent)                    |       | 1(referent)                     |       | 1(referent)                     |       |
| >93.9 (Quartile 4)                  | 0.380<br>(0.111-1.303)         | 0.380 | 0.392<br>(0.114-1.346)         | 0.392 | <b>10.405</b><br>(6.014-18.005) | 0.000 | <b>10.425</b><br>(6.024-18.042) | 0.000 |
| UIC (µg/L)                          |                                |       |                                |       |                                 |       |                                 |       |
| <150 (Iodine deficiency)            | 1.007<br>(0.998-1.017)         | 0.133 | 1.006<br>(0.997-1.016)         | 0.184 | 1.154<br>(0.163-8.165)          | 0.886 | 1.146<br>(0.160-8.226)          | 0.892 |
| 150-500 (Iodine sufficiency)        | 1(referent)                    |       | 1(referent)                    |       | 1(referent)                     |       | 1(referent)                     |       |
| >500 (Iodine excess)                | 1.016<br>(1.008-1.024)         | 0.418 | 0.982<br>(0.944-1.021)         | 0.359 | 1.191<br>(0.165-8.582)          | 0.862 | 1.170<br>(0.161-8.522)          | 0.877 |

<sup>1</sup> Multivariable models are adjusted for age, BMI, education and smoking status.

Abbreviations: UIC, urinary iodine concentration; SIC, serum iodine concentration.
